# Supplementary material for: Sexual transmission of Zika virus and other flaviviruses: A living systematic review
Source: PLoS Med. 2018 Jul 24;15(7):e1002611. doi: 10.1371/journal.pmed.1002611 (PMC6057622; doi:10.1371/journal.pmed.1002611)
Supplement: S3 Table — (XLSX) [file pmed.1002611.s004.xlsx]

## Sheet: Index
S6 Table. Certainty assessment of outcomes and studies
Index item	Sheet	References of methodology
Certainty assessment per outcome of the sexual transmission framework	Quality assessment outcomes	[29-31]
Risk of bias assessment of included cohort studies	Cohort studies	[26]
Risk of bias assessment of included case reports and case series	Case reports & case series	[25]
Risk of bias assessment of included mathematical modeling studies	Modelling studies	[28]
Risk of bias assessment of included in vivo studies	In vivo studies	[27]
References
[25] National Institutes of Health. NIH - Quality Assessment Tool for Case Series Studies 2014 [Access Date:01/11/2017]. Available from: https://www.nhlbi.nih.gov/health-pro/guidelines/in-develop/cardiovascular-risk-reduction/tools/case_series.
[26] National Institute for Health and Care Excellence. Guideline Development Methods: Information for National Collaborating Centres and Guideline Developers . (February 2004, updated 2005). http://www.nice.org.uk 2006 [Access Date:01/11/2017]. Available from: http://www.nice.org.uk.
[27] Hooijmans CR, Rovers MM, de Vries RB, Leenaars M, Ritskes-Hoitinga M, Langendam MW. SYRCLE's risk of bias tool for animal studies. BMC Med Res Methodol. 2014;14(1):43. doi: 10.1186/1471-2288-14-43. PubMed PMID: 24667063; PubMed Central PMCID: PMC4230647.
[28] Jaime Caro J, Eddy DM, Kan H, Kaltz C, Patel B, Eldessouki R, et al. Questionnaire to assess relevance and credibility of modeling studies for informing health care decision making: an ISPOR-AMCP-NPC Good Practice Task Force report. Value Health. 2014;17(2):174-82. doi: 10.1016/j.jval.2014.01.003. PubMed PMID: 24636375.
[29] Balshem H, Helfand M, Schunemann HJ, Oxman AD, Kunz R, Brozek J, et al. GRADE guidelines: 3. Rating the quality of evidence. J Clin Epidemiol. 2011;64(4):401-6. doi: 10.1016/j.jclinepi.2010.07.015. PubMed PMID: 21208779.
[30] Guyatt GH, Oxman AD, Sultan S, Glasziou P, Akl EA, Alonso-Coello P, et al. GRADE guidelines: 9. Rating up the quality of evidence. J Clin Epidemiol. 2011;64(12):1311-6. doi: 10.1016/j.jclinepi.2011.06.004. PubMed PMID: 21802902.
[31] Egger M, Johnson L, Althaus C, Schoni A, Salanti G, Low N, et al. Developing WHO guidelines: Time to formally include evidence from mathematical modelling studies. F1000Res. 2017;6:1584. Epub 2018/03/22. doi: 10.12688/f1000research.12367.2. PubMed PMID: 29552335; PubMed Central PMCID: PMC5829466.

## Sheet: Certainty assessment outcomes 
Certainty assessment							Value	Certainty
Number of studies	Study design	Risk of bias	Inconsistency	Indirectness	Imprecision	Other considerations
1. Susceptibility
	observational studies/ in vitro studies	not serious	not serious	serious	NA	Not quantifiable	NA	NA
2. Incubation period following sexual transmission
NA	NA	NA	NA	NA	NA	NA	NA	NA
3. Serial interval
13	case reports/ case series	not serious	not serious	not serious	not serious	small sample size	12 days (IQR: 10-14.5)	⨁⨀⨀⨀
								VERY LOW
4.1. Duration of infectiousness: Male genital tract, RT-PCR (cohort studies)
2	cohort study	not serious	not serious	serious	not serious	none	median: 34 days (95% CI: 28-41 days) - 35 days	⨁⨁⨀⨀
								LOW
4.1. Duration of infectiousness: Male genital tract, RT-PCR (case reports/ case series)
37	case reports/ case series	not serious	not serious	serious	not serious	reporting bias	median: 39.6 days (95% CI: 29.9-49.0 days)	⨁⨀⨀⨀
								VERY LOW
4.2. Duration of infectiousness: Male genital tract, viral culture
9	case reports/ case series	not serious	not serious	serious	not serious	small sample size	median: 11.6 days (95% CI: 1.1-20.9 days)	⨁⨀⨀⨀
								VERY LOW
4.3. Duration of infectiousness: Female genital tract, RT-PCR
7	case reports/ case series	not serious	not serious	serious	not serious	small sample size	median: 13.9 days (95% CI: 7.2-19.6 days)	⊕⨀⨀⨀
								VERY LOW
4.4. Duration of infectiousness: Saliva, RT-PCR
22	case reports/ case series	not serious	not serious	serious	not serious	small sample size	median: 6.8 days (95% CI: 4.3-9.6 days)	⨁⨀⨀⨀
								VERY LOW
5. Reproduction number due to sexual transmission
2	mathematical models	not serious	not serious	serious	serious	none	<1	⨁⨀⨀⨀
								VERY LOW
6. Probability of transmission per sex act
NA	NA	NA	NA	NA	NA	NA	NA	NA
7. Transmission rate
NA	NA	NA	NA	NA	NA	NA	NA	NA
Proportion of cases due to sexual transmission
2	mathematical models	not serious	not serious	serious	serious	none	3.044% (95% CI: 0.123-45.73%); 23% (95% CI: 1-47%)	⨁⨀⨀⨀
								VERY LOW

## Sheet: Cohort studies
references	Are the study participants representative of the population?	Does the study suffer from sampling bias?	Were there differences in loss-to-follow up between exposed and unexposed?	Is the issue of confounding adequately considered in the study design or analysis?	Is the statistical power of the study calculated or addressed?
[20]	Yes	No	NA	NA	No
[94]	Yes	No	NA	NA	No
[132]	Yes	No	NA	NA	No
[72]	Yes	No	NA	NA	No

## Sheet: Case reports & case series
reference	Was the study question or objective clearly stated?	Was the study population clearly and fully described, including a case definition?	Were the cases consecutive?	Were the subjects comparable?	Was the intervention clearly described?	Were the outcome measures clearly defined, valid, reliable, and implemented consistently across all study participants?	Was the length of follow-up adequate?	Were the statistical methods well-described?	Were the results well-described?	High diagnostic certainty in couples?	Exclusion of mosquito borne transmission in the secondary partner(s)?
[6]	Yes	Yes	NA	NA	NA	Yes	Yes	NA	Yes	No	Yes
[75]	Yes	Yes	NA	NA	NA	NA	No	NA	NA	NA	NA
[76]	Yes	Yes	NA	NA	NA	Yes	No	NA	No	NA	NA
[77]	Yes	NA	NA	NA	NA	NA	NA	NA	NA	NA	NA
[78]	Yes	Yes	NA	NA	NA	Yes	Yes	NA	Yes	No	Yes
[79]	Yes	Yes	Yes	Yes	NA	Yes	NA	NA	Yes	No	No
[80]	NA	NA	NA	NA	NA	NA	NA	NA	NA	NA	NA
[81]	Yes	Yes	NA	NA	NA	Yes	Yes	NA	Yes	NA	NA
[82]	Yes	Yes	Yes	Yes	NA	No	NA	NA	No	No	No
[83]	Yes	Yes	Yes	Yes	NA	Yes	No	No	Yes	NA	NA
[84]	Yes	Yes	NA	NA	NA	Yes	Yes	NA	Yes	Yes	Yes
[85]	Yes	Yes	NA	NA	NA	Yes	Yes	NA	Yes	No	Yes
[86]	Yes	Yes	NA	NA	NA	NA	No	NA	Yes	NA	NA
[172]	Yes	Yes	NA	NA	NA	Yes	Yes	NA	Yes	Yes	No
[88]	Yes	Yes	NA	NA	NA	Yes	No	NA	Yes	Yes	No
[89]	Yes	Yes	NA	NA	NA	Yes	Yes	NA	Yes	NA	NA
[90]	Yes	Yes	NA	NA	NA	Yes	Yes	No	Yes	No	Yes
[91]	Yes	Yes	NA	NA	NA	Yes	Yes	NA	Yes	No	Yes
[92]	Yes	Yes	NA	NA	NA	Yes	Yes	NA	Yes	NA	NA
[93]	Yes	Yes	Yes	Yes	NA	Yes	No	NA	Yes	NA	NA
[94]	NA	NA	NA	NA	NA	NA	NA	NA	NA	NA	NA
[95]	Yes	Yes	NA	NA	NA	Yes	No	NA	Yes	NA	NA
[96]	Yes	Yes	NA	NA	NA	Yes	Yes	NA	Yes	Yes	Yes
[97]	Yes	Yes	NA	NA	NA	Yes	Yes	NA	No	NA	NA
[98]	Yes	Yes	NA	NA	NA	Yes	Yes	NA	Yes	NA	NA
[99]	Yes	Yes	NA	NA	NA	Yes	Yes	NA	Yes	NA	NA
[100]	Yes	Yes	NA	NA	NA	Yes	No	NA	Yes	No	Yes
[101]	Yes	Yes	Yes	Yes	NA	Yes	No	NA	Yes	NA	NA
[102]	Yes	Yes	NA	NA	NA	Yes	Yes	NA	Yes	Yes	Yes
[103]	Yes	Yes	Yes	Yes	NA	Yes	Yes	NA	Yes	NA	NA
[104]	Yes	Yes	NA	NA	NA	Yes	Yes	NA	Yes	NA	NA
[105]	Yes	No	NA	NA	NA	No	NA	NA	No	No	NA
[106]	Yes	Yes	NA	NA	NA	Yes	NA	NA	Yes	NA	NA
[107]	Yes	Yes	NA	NA	NA	Yes	Yes	Yes	Yes	NA	NA
[108]	Yes	NA	NA	NA	NA	NA	NA	NA	NA	NA	NA
[109]	Yes	Yes	NA	NA	Yes	Yes	Yes	Yes	Yes	NA	NA
[110]	Yes	Yes	NA	NA	NA	Yes	Yes	NA	Yes	NA	NA
[111]	Yes	Yes	Yes	Yes	NA	Yes	Yes	NA	Yes	NA	NA
[112]	Yes	Yes	NA	NA	NA	Yes	Yes	NA	Yes	NA	NA
[113]	Yes	Yes	Yes	Yes	NA	Yes	No	NA	No	No	NA
[114]	Yes	Yes	NA	NA	NA	Yes	Yes	NA	Yes	NA	NA
[115]	Yes	Yes	NA	NA	NA	Yes	Yes	NA	Yes	Yes	No
[116]	Yes	Yes	NA	NA	NA	Yes	No	NA	Yes	NA	NA
[117]	Yes	Yes	Yes	Yes	NA	Yes	No	NA	Yes	NA	NA
[118]	Yes	Yes	NA	NA	Yes	NA	Yes	NA	Yes	NA	NA
[119]	No	No	NA	NA	NA	No	No	NA	No	No	No
[120]	No	No	NA	NA	NA	No	NA	NA	No	No	No
[121]	No	No	NA	NA	NA	No	NA	No	No	No	No
[122]	Yes	Yes	NA	NA	NA	NA	No	NA	No	NA	NA
[123]	NA	NA	NA	NA	NA	NA	NA	NA	No	NA	NA
[20]	NA	NA	NA	NA	NA	NA	NA	NA	NA	NA	NA
[124]	Yes	Yes	NA	NA	NA	Yes	No	Yes	Yes	Yes	Yes
[125]	NA	Yes	Yes	Yes	NA	Yes	Yes	NA	NA	NA	NA
[126]	Yes	Yes	NA	NA	NA	Yes	Yes	NA	Yes	NA	NA
[127]	Yes	Yes	NA	NA	NA	Yes	NA	NA	Yes	Yes	NA
[128]	Yes	Yes	Yes	Yes	NA	Yes	Yes	NA	Yes	NA	NA
[129]	Yes	Yes	Yes	Yes	NA	Yes	Yes	Yes	Yes	NA	NA
[130]	Yes	Yes	Yes	Yes	NA	Yes	Yes	NA	Yes	NA	NA
[131]	Yes	Yes	NA	NA	NA	Yes	Yes	NA	Yes	Yes	Yes
[134]	Yes	Yes	Yes	Yes	NA	Yes	Yes	NA	Yes	NA	NA
[133]	Yes	Yes	Yes	Yes	NA	Yes	Yes	NA	Yes	NA	NA
[135]	Yes	Yes	NA	NA	NA	Yes	Yes	NA	Yes	NA	NA
[136]	Yes	Yes	NA	Yes	NA	Yes	Yes	NA	Yes	NA	NA
[138]	Yes	Yes	Yes	Yes	NA	Yes	Yes	NA	Yes	NA	NA
High diagnostic certainty in couples? is defined for case reports and case series that describe sexual transmission in at least one of the couple has PCR confirmed ZIKV.
Exclusion of mosquito borne transmission in the secondary partner(s)? Is defined as

## Sheet: Modelling studies
reference	Is the population relevant?	Are any critical interventions missing?	Is the context (settings and circumstances) applicable?	Is external validation of the model sufficient to make its results credible for your decision?	Is internal verification of the model sufficient to make its results credible for your decision?	Does the model have sufficient face validity to make its results credible for your decision?	Is the design of the model adequate for your decision problem?	Are the data used in populating the model suitable for your decision problem?	Were the analyses performed using the model adequate to inform your decision problem?	Was there an adequate assessment of the effects of uncertainty?	Was the reporting of the model adequate to inform your decision problem?	Was the interpretation of results fair and balanced?	Were there any potential conflicts of interest?
[139]	Yes	No	Yes	No	Yes	Yes	Yes	No	Yes	Yes	Yes	Yes	No
[140]	Yes	No	Yes	No	Yes	Yes	Yes	Yes	Yes	No	Yes	Yes	No

## Sheet: In vivo studies
reference	Is the hypothesis of the experiment clearly stated?	Was the allocation sequence adequately generated and applied?	Were the groups similar at baseline or were they adjusted for confounders in the analysis?	Was the allocation adequately concealed?	Were the animals randomly housed during the experiment?	Were the caregivers and/or investigators blinded from knowledge which intervention each animal received during the experiment?	Were animals selected at random for outcome assessment?	Was the outcome assessor blinded?	Were incomplete outcome data adequately addressed?	Are reports of the study free of selective outcome reporting?	Was the study apparently free of other problems that could result in high risk of bias?
[32]	Yes	NA	NA	NA	NA	No	No	No	NA	Yes	NA
[33]	Yes	NA	NA	NA	NA	NA	NA	NA	NA	Yes	NA
[34]	Yes	NA	NA	NA	NA	NA	NA	NA	Yes	Yes	NA
[36]	Yes	NA	NA	NA	NA	NA	NA	NA	No	Yes	NA
[37]	Yes	No	NA	NA	NA	No	NA	NA	NA	NA	NA
[38]	Yes	No	NA	NA	NA	No	NA	NA	NA	Yes	NA
[39]	Yes	No	NA	NA	NA	No	NA	NA	NA	NA	NA
[40]	Yes	NA	NA	NA	NA	NA	NA	NA	NA	NA	NA
[41]	Yes	NA	NA	NA	NA	NA	NA	NA	NA	NA	NA
[42]	Yes	NA	NA	NA	NA	NA	NA	NA	NA	Yes	NA
[43]	Yes	Yes	No	NA	NA	Yes	NA	NA	NA	NA	NA
[44]	Yes	No	NA	NA	NA	NA	NA	NA	NA	No	NA
[46]	Yes	No	NA	NA	NA	NA	NA	NA	NA	NA	NA
[47]	Yes	NA	NA	NA	NA	No	NA	NA	NA	NA	NA
[48]	Yes	NA	No	No	NA	NA	NA	NA	NA	Yes	NA
[49]	Yes	NA	NA	NA	NA	NA	NA	NA	NA	Yes	NA
[50]	Yes	NA	NA	NA	NA	NA	NA	NA	NA	Yes	NA
[51]	Yes	NA	NA	NA	NA	NA	NA	NA	No	NA	NA
[52]	Yes	No	NA	NA	NA	NA	NA	NA	NA	NA	NA
[53]	Yes	NA	NA	NA	NA	NA	NA	NA	NA	Yes	NA
[54]	Yes	NA	NA	NA	NA	NA	NA	NA	NA	NA	NA
[55]	Yes	NA	NA	NA	NA	NA	NA	NA	NA	NA	NA
[56]	Yes	NA	NA	NA	NA	NA	NA	NA	NA	NA	NA
[57]	Yes	NA	NA	NA	NA	NA	NA	NA	NA	NA	NA
[58]	Yes	Yes	NA	NA	NA	NA	Yes	No	NA	NA	NA
[59]	Yes	NA	NA	NA	NA	NA	NA	NA	NA	NA	NA
[63]	Yes	NA	NA	NA	NA	NA	NA	NA	NA	NA	NA
[64]	Yes	NA	NA	NA	NA	NA	NA	NA	NA	NA	NA
[65]	Yes	NA	NA	NA	NA	NA	NA	NA	NA	NA	NA
[66]	Yes	NA	Yes	NA	Yes	NA	NA	NA	NA	NA	NA
[67]	Yes	NA	NA	NA	NA	NA	NA	NA	NA	NA	NA
[68]	Yes	NA	NA	NA	NA	NA	NA	NA	NA	NA	NA
[69]	Yes	NA	NA	NA	NA	NA	NA	NA	NA	NA	NA
[71]	Yes	NA	NA	NA	NA	NA	Yes	NA	NA	NA	NA
